# Supplementary material for: Integrating Frailty and Cumulative Lipid Burden for Stroke Risk Stratification: A Machine Learning–Guided Athero -Frailty Score From the CHARLS Cohort
Source: Research Square preprint supplement (doi:10.21203/rs.3.rs-8788634/v1), 2026-02-11
Supplement: Supplementary file 1 [file 088e78d747d316e99798c101.docx]

**Supplementary Table 2. Sensitivity analysis: Binary logistic regression models assessing the association of cumAIP and AFS with incident stroke.**

| Categories | Model 1 | | Model 2 | | Model 3 | | Model 4 | |
| --- | --- | --- | --- | --- | --- | --- | --- | --- |
| OR (95% CI) | P | OR (95% CI) | P | OR (95% CI) | P | OR (95% CI) | P |
| cumAIP |  |  |  |  |  |  |  |  |
| Per 1 SD increase | 1.34 (1.14, 1.58) | <0.001 | 1.37 (1.16, 1.62) | <0.001 | 1.29 (1.08, 1.54) | 0.004 | 1.21 (1.01, 1.45) | 0.039 |
| Group | OR (95% CI) | P | OR (95% CI) | P | OR (95% CI) | P | OR (95% CI) | P |
| cumAIP |  |  |  |  |  |  |  |  |
| T1 | Ref. | — | Ref. | — | Ref. | — | Ref. | — |
| T2 | 1.83 (1.13, 3.05) | 0.017 | 1.86 (1.14, 3.10) | 0.014 | 1.79 (1.10, 3.00) | 0.022 | 1.68 (1.03, 2.82) | 0.043 |
| T3 | 2.26 (1.41, 3.70) | <0.001 | 2.35 (1.46, 3.86) | <0.001 | 2.05 (1.26, 3.41) | 0.005 | 1.77 (1.08, 2.98) | 0.027 |
| P for trend |  | <0.001 |  | <0.001 |  | 0.005 |  | 0.035 |
| AFS |  |  |  |  |  |  |  |  |
| Per 1 SD increase | 4.49 (2.93, 6.81) | <0.001 | 3.94 (2.53, 6.09) | <0.001 | 3.45 (2.18, 5.43) | <0.001 | 2.85 (1.74, 4.61) | <0.001 |
| Group | OR (95% CI) | P | OR (95% CI) | P | OR (95% CI) | P | OR (95% CI) | P |
| AFS |  |  |  |  |  |  |  |  |
| T1 | Ref. | — | Ref. | — | Ref. | — | Ref. | — |
| T2 | 2.31 (1.36, 4.07) | 0.003 | 2.25 (1.32, 3.98) | 0.004 | 2.15 (1.26, 3.81) | 0.006 | 1.98 (1.15, 3.53) | 0.016 |
| T3 | 3.44 (2.09, 5.94) | <0.001 | 3.03 (1.46, 3.86) | <0.001 | 2.67 (1.59, 4.68) | <0.001 | 2.14 (1.24, 3.83) | 0.008 |
| P for trend |  | <0.001 |  | <0.001 |  | <0.001 |  | 0.012 |

Notes: Data are presented as odd ratios (95% confidence intervals). Model 1: Unadjusted. Model 2: Adjusted for Age and Sex. Model 3: Model 2 + adjusted for SBP, FPG, eGFR, CRP, and BUN. Model 4: Model 3 + adjusted for anti-hypertensive agents, anti-diabetic agents, and lipid-lowering agents. Abbreviations: cumAIP, cumulative atherogenic index of plasma; SBP, systolic blood pressure; FPG, fasting plasma glucose; eGFR, estimated glomerular filtration rate; CRP, C-reactive protein; BUN, blood urea nitrogen.
