# Supplementary material for: Integrating Frailty and Cumulative Lipid Burden for Stroke Risk Stratification: A Machine Learning–Guided Athero -Frailty Score From the CHARLS Cohort
Source: Research Square preprint supplement (doi:10.21203/rs.3.rs-8788634/v1), 2026-02-11
Supplement: Supplementary file 2 [file 0c2aaa8269cdbd13b86511ef.docx]

## Table 2. Hazard ratios (95% CIs) for incident stroke associated with cumAIP and the novel Athero-Frailty Score (AFS).

| Categories | Cases / Participants | Model 1 | | Model 2 | | Model 3 | | Model 4 | |
| --- | --- | --- | --- | --- | --- | --- | --- | --- | --- |
|  | HR (95% CI) | P | HR (95% CI) | P | HR (95% CI) | P | HR (95% CI) | P |
| cumAIP Analysis |  |  |  |  |  |  |  |  |  |
| Per 1 SD increase | — | 1.33 (1.14, 1.57) | <0.001 | 1.36 (1.15, 1.60) | <0.001 | 1.28 (1.05, 1.52) | 0.005 | 1.20 (1.01, 1.43) | 0.042 |
| Tertiles |  |  |  |  |  |  |  |  |  |
| T1 | 25 / 1230 | Ref. | — | Ref. | — | Ref. | — | Ref. | — |
| T2 | 45 / 1230 | 1.82 (1.11, 2.96) | 0.017 | 1.85 (1.13, 3.01) | 0.014 | 1.77 (1.08, 2.90) | 0.023 | 1.66 (1.01, 2.72) | 0.044 |
| T3 | 55 / 1230 | 2.23 (1.39, 3.58) | <0.001 | 2.31 (1.44, 3.71) | <0.001 | 2.01 (1.24, 3.28) | 0.005 | 1.74 (1.06, 2.86) | 0.029 |
| P for trend |  |  | <0.001 |  | <0.001 |  | 0.006 |  | 0.038 |
| AFS Analysis |  |  |  |  |  |  |  |  |  |
| Per 1 SD increase | — | 4.33 (2.89, 6.47) | <0.001 | 3.76 (2.47, 5.72) | <0.001 | 3.29 (2.13, 5.09) | <0.001 | 2.75 (1.73, 4.38) | <0.001 |
| Tertiles |  |  |  |  |  |  |  |  |  |
| T1 | 19 / 1230 | Ref. | — | Ref. | — | Ref. | — | Ref. | — |
| T2 | 43 / 1230 | 2.29 (1.33, 3.93) | 0.003 | 2.23 (1.30, 3.83) | 0.004 | 2.12 (1.23, 3.65) | 0.007 | 1.96 (1.13, 3.39) | 0.016 |
| T3 | 63 / 1230 | 3.38 (2.02, 5.65) | <0.001 | 2.97 (1.76, 5.01) | <0.001 | 2.62 (1.54, 4.45) | <0.001 | 2.11 (1.21, 3.66) | 0.008 |
| P for trend |  |  | <0.001 |  | <0.001 |  | <0.001 |  | 0.013 |

Notes: Data are presented as hazard ratios (95% confidence intervals). Model 1: Unadjusted. Model 2: Adjusted for age and sex. Model 3: Model 2 + adjusted for SBP, FPG, eGFR, CRP, and BUN. Model 4: Model 3 + adjusted for antihypertensive agents, antidiabetic agents, and lipid-lowering agents. Abbreviations: cumAIP, cumulative atherogenic index of plasma; AFS, Athero-Frailty Score; SBP, systolic blood pressure; FPG, fasting plasma glucose; eGFR, estimated glomerular filtration rate; CRP, C-reactive protein; BUN, blood urea nitrogen.
