# Supplementary material for: Integrating Frailty and Cumulative Lipid Burden for Stroke Risk Stratification: A Machine Learning–Guided Athero -Frailty Score From the CHARLS Cohort
Source: Research Square preprint supplement (doi:10.21203/rs.3.rs-8788634/v1), 2026-02-11
Supplement: Supplementary file 3 [file 2e27bed317b0809116cb1b7c.docx]

## Table S3. Hazard ratios (95% CIs) for incident stroke associated with cumAIP*FI.

| Categories | Model 1 | | Model 2 | | Model 3 | | Model 4 | |
| --- | --- | --- | --- | --- | --- | --- | --- | --- |
| HR (95% CI) | P | HR (95% CI) | P | HR (95% CI) | P | HR (95% CI) | P |
| cumAIP*FI Analysis |  |  |  |  |  |  |  |  |
| Per 1 SD increase | 1.36 (1.18, 1.56) | <0.001 | 1.30 (1.13, 1.48) | <0.001 | 1.25 (1.09, 1.43) | 0.001 | 1.23 (1.07, 1.41) | 0.003 |
| Tertiles |  |  |  |  |  |  |  |  |
| T1 | Ref. | — | Ref. | — | Ref. | — | Ref. | — |
| T2 | 1.54 (0.97, 2.44) | 0.066 | 1.50 (0.95, 2.38) | 0.084 | 1.49 (0.94, 2.36) | 0.092 | 1.27 (0.79, 2.05) | 0.330 |
| T3 | 1.64 (1.04, 2.59) | 0.032 | 1.63 (1.03, 2.57) | 0.035 | 1.59 (1.01, 2.51) | 0.045 | 1.04 (0.58, 1.86) | 0.892 |
| P for trend |  | 0.035 |  | 0.038 |  | 0.049 |  | 0.912 |

Notes: Data are presented as hazard ratios (95% confidence intervals). Model 1: Unadjusted. Model 2: Adjusted for Age and Sex. Model 3: Model 2 + adjusted for SBP, FPG, eGFR, CRP, and BUN. Model 4: Model 3 + adjusted for antihypertensive agents, antidiabetic agents, and lipid-lowering agents. Abbreviations: cumAIP, cumulative atherogenic index of plasma; AFS, Athero-Frailty Score; SBP, systolic blood pressure; FPG, fasting plasma glucose; eGFR, estimated glomerular filtration rate; CRP, C-reactive protein; BUN, blood urea nitrogen.
