# Supplementary material for: Integrating Frailty and Cumulative Lipid Burden for Stroke Risk Stratification: A Machine Learning–Guided Athero -Frailty Score From the CHARLS Cohort
Source: Research Square preprint supplement (doi:10.21203/rs.3.rs-8788634/v1), 2026-02-11
Supplement: Supplementary file 4 [file 59f124bd1b61ee79c489e47b.docx]

Table S4. Incremental predictive value of adding cumAIP, AFS, or cumAIP*FI to the baseline risk model for stroke.

| Models | C-statistic (95% CI) | P value | NRI (95% CI) | P value | IDI (95% CI) | P value |
| --- | --- | --- | --- | --- | --- | --- |
| Model 1 (Baseline) | 0.681 (0.636–0.727) | Ref. | Ref. | - | Ref. | - |
| Model 2 (+ cumAIP) | 0.691 (0.646–0.735) | - | 0.111 (-0.017, 0.222) | 0.084 | 0.000 (-0.003, 0.007) | 0.619 |
| **Model 3 (+ AFS)** | **0.706 (0.663–0.748)** | **-** | **0.154 (0.039, 0.276)** | **0.004** | **0.007 (-0.002, 0.024)** | **0.088** |
| Model 4 (+ cumAIP*FI) | 0.676 (0.626–0.726) | - | 0.062 (-0.073, 0.151) | 0.439 | 0.007 (-0.000, 0.040) | 0.076 |
| **Model 5 (+ AFS + cumAIP*FI)** | **0.707 (0.663–0.750)** | **-** | **0.014 (-0.128, 0.138)** | **0.974** | **0.004 (-0.001, 0.024)** | **0.156** |

Abbreviations: AFS, Athero-Frailty Score; cumAIP, cumulative Atherogenic Index of Plasma; cumAIP*FI, multiplicative product score (pre-defined); NRI, net reclassification improvement; IDI, integrated discrimination improvement; CI, confidence interval.
Model 1 (Baseline): adjusted for Age, Sex, SBP, FPG, eGFR, CRP, and BUN, antihypertensive agents, antidiabetic agents, and lipid-lowering agents.
Model 2: Model 1 + cumAIP.
Model 3: Model 1 + AFS.
Model 4: Model 1 + cumAIP*FI.
Model 5: Model 1 + AFS + cumAIP*FI; for IDI/NRI, values represent incremental improvement from Model 3 to Model 5 (AFS -> AFS+cumAIP*FI).
