# Supplementary material for: Integrating Frailty and Cumulative Lipid Burden for Stroke Risk Stratification: A Machine Learning–Guided Athero -Frailty Score From the CHARLS Cohort
Source: Research Square preprint supplement (doi:10.21203/rs.3.rs-8788634/v1), 2026-02-11
Supplement: Supplementary file 5 [file 9f315f83c270cbe2d8a278e9.docx]

Table 1. Baseline characteristics of the study population stratified by tertiles of cumulative atherogenic index of plasma (cumAIP).

| **Characteristic** | **T1** | **T2** | **T3** | **p-value** |
| --- | --- | --- | --- | --- |
| Age | 61.28 ± 8.82 | 60.91 ± 8.35 | 60.26 ± 8.52 | 0.016 |
| Male | 619 (50%) | 553 (45%) | 531 (43%) | 0.001 |
| Residential area (Urban) | 351 (29%) | 441 (36%) | 474 (39%) | <0.001 |
| Marital Status |  |  |  | 0.462 |
| Married and living with a spouse | 1,051 (85%) | 1,063 (86%) | 1,080 (88%) |  |
| Married but living without a spouse | 42 (3.4%) | 42 (3.4%) | 41 (3.3%) |  |
| Single, divorced, and widowed | 137 (11%) | 125 (10%) | 109 (8.9%) |  |
| Education Status |  |  |  | 0.025 |
| Elementary school or below | 837 (68%) | 808 (66%) | 773 (63%) |  |
| Middle school or above | 393 (32%) | 422 (34%) | 457 (37%) |  |
| Annual Household Expenditure | 12,393.16 ± 19,431.99 | 12,708.39 ± 20,460.87 | 14,142.21 ± 21,483.38 | 0.003 |
| Smoking Status | 578 (47%) | 506 (41%) | 526 (43%) | 0.010 |
| Drinking Status | 516 (42%) | 431 (35%) | 386 (31%) | <0.001 |
| BMI (kg/m²) | 23.30 ± 13.83 | 25.35 ± 28.41 | 26.03 ± 19.38 | <0.001 |
| SBP (mmHg) | 124.23 ± 19.48 | 126.08 ± 18.94 | 130.00 ± 19.26 | <0.001 |
| DBP (mmHg) | 73.11 ± 11.35 | 74.88 ± 11.69 | 76.96 ± 11.61 | <0.001 |
| Number of chronic conditions |  |  |  | <0.001 |
| 0 | 293 (24%) | 256 (21%) | 212 (17%) |  |
| 1 | 360 (29%) | 342 (28%) | 319 (26%) |  |
| ≥2 | 577 (47%) | 632 (51%) | 699 (57%) |  |
| Frailty Status |  |  |  | 0.017 |
| Robust (FI ≤ 0.10) | 496 (40%) | 490 (40%) | 437 (36%) |  |
| Pre-frail (0.10 < FI < 0.25) | 563 (46%) | 530 (43%) | 589 (48%) |  |
| Frail (FI ≥ 0.25) | 171 (14%) | 210 (17%) | 204 (17%) |  |
| FI | 0.14 ± 0.11 | 0.15 ± 0.12 | 0.16 ± 0.11 | 0.022 |
| cumAIP | 0.24 ± 0.36 | 1.05 ± 0.20 | 2.05 ± 0.57 | <0.001 |
| AIP (2011) | 0.14 ± 0.10 | 0.33 ± 0.15 | 0.70 ± 0.28 | <0.001 |
| AIP (2015) | 0.16 ± 0.11 | 0.37 ± 0.15 | 0.67 ± 0.21 | <0.001 |
| FPG (mmol/L) | 5.35 ± 1.49 | 5.63 ± 1.88 | 6.21 ± 2.39 | <0.001 |
| LDL-C (mmol/L) | 2.59 ± 0.70 | 2.74 ± 0.71 | 2.61 ± 0.76 | <0.001 |
| HDL-C (mmol/L) | 1.55 ± 0.32 | 1.29 ± 0.22 | 1.15 ± 0.21 | <0.001 |
| TC (mmol/L) | 4.66 ± 0.87 | 4.71 ± 0.86 | 4.95 ± 1.05 | <0.001 |
| eGFR (mL/min/1.73m²) | 90.54 ± 14.63 | 90.10 ± 15.00 | 89.96 ± 16.24 | 0.808 |
| UA (µmol/L) | 274 ± 76 | 286 ± 78 | 310 ± 86 | <0.001 |
| BUN (mmol/L) | 5.75 ± 1.68 | 5.54 ± 1.56 | 5.48 ± 1.55 | <0.001 |
| CRP (mg/L) | 1.94 ± 3.99 | 2.36 ± 5.45 | 3.47 ± 6.42 | <0.001 |
| TG (mmol/L) | 0.92 ± 0.30 | 1.37 ± 0.46 | 2.54 ± 1.18 | <0.001 |
| Antihypertensive agents | 201 (16%) | 296 (24%) | 416 (34%) | <0.001 |
| Antidiabetic agents | 30 (2.4%) | 54 (4.4%) | 131 (11%) | <0.001 |
| Lipid-lowering agents | 46 (3.7%) | 84 (6.8%) | 169 (14%) | <0.001 |
| Stroke | 25 (2.0%) | 45 (3.7%) | 55 (4.5%) | 0.003 |

Notes: Data are presented as mean ± standard deviation (SD) for continuous variables and as number (percentage) for categorical variables. P-values were calculated using one-way analysis of variance (ANOVA) or Kruskal-Wallis test for continuous variables, and Pearson’s chi-square test for categorical variables. All lipid profiles, glucose, and renal function markers were converted to SI units (mmol/L or µmol/L) for standardization. Abbreviations: cumAIP, cumulative atherogenic index of plasma; AIP, atherogenic index of plasma; BMI, body mass index; SBP, systolic blood pressure; DBP, diastolic blood pressure; FI, frailty index; FPG, fasting plasma glucose; TC, total cholesterol; TG, triglycerides; HDL-C, high-density lipoprotein cholesterol; LDL-C, low-density lipoprotein cholesterol; eGFR, estimated glomerular filtration rate; UA, uric acid; BUN, blood urea nitrogen; CRP, C-reactive protein. SI Unit Conversion Factors: Glucose (mg/dL to mmol/L: ×0.0555); Total Cholesterol, HDL-C, LDL-C (mg/dL to mmol/L: ×0.0259); Triglycerides (mg/dL to mmol/L: ×0.0113); Uric Acid (mg/dL to µmol/L: ×59.48); BUN (mg/dL to mmol/L: ×0.357).
