# Supplementary material for: Integrating Frailty and Cumulative Lipid Burden for Stroke Risk Stratification: A Machine Learning–Guided Athero -Frailty Score From the CHARLS Cohort
Source: Research Square preprint supplement (doi:10.21203/rs.3.rs-8788634/v1), 2026-02-11
Supplement: Supplementary file 6 [file b39209ce44c9772c378e29c5.docx]

**Table 3. Incremental predictive value of adding cumAIP or AFS to the baseline risk model for stroke.**

| Models | C-statistic (95% CI) | P value | IDI (95% CI) | P value | NRI (95% CI) | P value |
| --- | --- | --- | --- | --- | --- | --- |
| Model 1 (Baseline) | 0.681 (0.636–0.727) | Ref. | Ref. | - | Ref. | - |
| Model 2 (+ cumAIP) | 0.691 (0.646–0.735) | 0.215 | 0.000 (-0.002, 0.006) | 0.583 | 0.111 (-0.019, 0.218) | 0.076 |
| Model 3 (+ AFS) | 0.706 (0.663–0.748) | <0.001 | 0.007 (-0.001, 0.024) | 0.088 | 0.154 (0.053, 0.277) | <0.001 |

Abbreviations: AFS, Athero-Frailty Score; cumAIP, cumulative Atherogenic Index of Plasma; NRI, net reclassification improvement; IDI, integrated discrimination improvement; CI, confidence interval.
Model 1: Adjusted for Age, Sex, SBP, FPG, CRP, eGFR, BUN, Anti-hypertensive agents, Anti-diabetic agents, Lipid-lowering agents.
Model 2: Model 1 + cumAIP.
Model 3: Model 1 + AFS.
