# Supplementary material for: Integrating Frailty and Cumulative Lipid Burden for Stroke Risk Stratification: A Machine Learning–Guided Athero -Frailty Score From the CHARLS Cohort
Source: Research Square preprint supplement (doi:10.21203/rs.3.rs-8788634/v1), 2026-02-11
Supplement: Supplementary file 7 [file cdbb4510e7c2f3219c39813d.docx]

**Table 2. Baseline characteristics of the study population stratified by tertiles of Athero-Frailty Score (AFS).**

| Characteristic | T1 | T2 | T3 | p-value |
| --- | --- | --- | --- | --- |
| Age | 59.86 ± 8.25 | 60.19 ± 8.60 | 62.40 ± 8.65 | <0.001 |
| Male | 676 (55%) | 575 (47%) | 452 (37%) | <0.001 |
| Residential area (Urban) | 416 (34%) | 470 (38%) | 380 (31%) | <0.001 |
| Marital Status |  |  |  | 0.073 |
| Married and living with a spouse | 1,080 (88%) | 1,068 (87%) | 1,046 (85%) |  |
| Married but living without a spouse | 38 (3.1%) | 49 (4.0%) | 38 (3.1%) |  |
| Single, divorced, and widowed | 112 (9.1%) | 113 (9.2%) | 146 (12%) |  |
| Education Status |  |  |  | <0.001 |
| Elementary school or below | 720 (59%) | 796 (65%) | 902 (73%) |  |
| Middle school or above | 510 (41%) | 434 (35%) | 328 (27%) |  |
| Annual Household Expenditure | 13,268.13 ± 20,959.44 | 13,666.01 ± 22,201.36 | 12,309.62 ± 18,065.25 | 0.240 |
| Smoking Status | 601 (49%) | 528 (43%) | 481 (39%) | <0.001 |
| Drinking Status | 557 (45%) | 448 (36%) | 328 (27%) | <0.001 |
| BMI (kg/m²) | 23.99 ± 23.82 | 25.52 ± 27.69 | 25.17 ± 6.53 | <0.001 |
| SBP (mmHg) | 123.60 ± 18.63 | 125.97 ± 18.60 | 130.74 ± 20.17 | <0.001 |
| DBP (mmHg) | 73.76 ± 11.23 | 74.80 ± 11.67 | 76.39 ± 11.91 | <0.001 |
| Number of chronic conditions |  |  |  | <0.001 |
| 0 | 470 (38%) | 223 (18%) | 68 (5.5%) |  |
| 1 | 411 (33%) | 371 (30%) | 239 (19%) |  |
| ≥2 | 349 (28%) | 636 (52%) | 923 (75%) |  |
| Frailty Status |  |  |  | <0.001 |
| Robust (FI ≤ 0.10) | 918 (75%) | 430 (35%) | 75 (6.1%) |  |
| Pre-frail (0.10 < FI < 0.25) | 312 (25%) | 775 (63%) | 595 (48%) |  |
| Frail (FI ≥ 0.25) | 0 (0%) | 25 (2.0%) | 560 (46%) |  |
| FI | 0.07 ± 0.04 | 0.12 ± 0.06 | 0.26 ± 0.12 | <0.001 |
| cumAIP | -0.75 ± 0.62 | 0.10 ± 0.72 | 0.66 ± 1.04 | <0.001 |
| AIP (2011) | 0.20 ± 0.15 | 0.40 ± 0.24 | 0.57 ± 0.36 | <0.001 |
| AIP (2015) | 0.23 ± 0.16 | 0.42 ± 0.22 | 0.56 ± 0.28 | <0.001 |
| FPG (mmol/L) | 5.38 ± 1.45 | 5.68 ± 1.80 | 6.12 ± 2.49 | <0.001 |
| LDL-C (mmol/L) | 2.64 ± 0.70 | 2.69 ± 0.74 | 2.62 ± 0.74 | 0.067 |
| HDL-C (mmol/L) | 1.46 ± 0.32 | 1.30 ± 0.27 | 1.23 ± 0.27 | <0.001 |
| TC (mmol/L) | 4.68 ± 0.85 | 4.77 ± 0.90 | 4.89 ± 1.04 | <0.001 |
| eGFR (mL/min/1.73m²) | 91.40 ± 14.18 | 90.59 ± 15.38 | 88.61 ± 16.15 | <0.001 |
| UA (µmol/L) | 281.34 ± 76.13 | 290.86 ± 80.89 | 297.40 ± 85.65 | <0.001 |
| BUN (mmol/L) | 5.68 ± 1.64 | 5.51 ± 1.58 | 5.59 ± 1.59 | 0.044 |
| CRP (mg/L) | 1.88 ± 4.15 | 2.42 ± 4.41 | 3.47 ± 7.08 | <0.001 |
| TG (mmol/L) | 1.06 ± 0.43 | 1.60 ± 0.82 | 2.18 ± 1.28 | <0.001 |
| Antihypertensive agents | 124 (10%) | 296 (24%) | 493 (40%) | <0.001 |
| Antidiabetic agents | 24 (2.0%) | 43 (3.5%) | 148 (12%) | <0.001 |
| Lipid-lowering agents | 26 (2.1%) | 78 (6.3%) | 195 (16%) | <0.001 |
| Stroke | 19 (1.5%) | 43 (3.5%) | 63 (5.1%) | <0.001 |

Notes: Data are presented as mean ± standard deviation (SD) for continuous variables and as number (percentage) for categorical variables. P-values were calculated using one-way analysis of variance (ANOVA) or Kruskal-Wallis test for continuous variables, and Pearson’s chi-square test for categorical variables. All lipid profiles, glucose, and renal function markers were converted to SI units (mmol/L or µmol/L) for standardization. Abbreviations: cumAIP, cumulative atherogenic index of plasma; AIP, atherogenic index of plasma; BMI, body mass index; SBP, systolic blood pressure; DBP, diastolic blood pressure; FI, frailty index; FPG, fasting plasma glucose; TC, total cholesterol; TG, triglycerides; HDL-C, high-density lipoprotein cholesterol; LDL-C, low-density lipoprotein cholesterol; eGFR, estimated glomerular filtration rate; UA, uric acid; BUN, blood urea nitrogen; CRP, C-reactive protein. SI Unit Conversion Factors: Glucose (mg/dL to mmol/L: ×0.0555); Total Cholesterol, HDL-C, LDL-C (mg/dL to mmol/L: ×0.0259); Triglycerides (mg/dL to mmol/L: ×0.0113); Uric Acid (mg/dL to µmol/L: ×59.48); BUN (mg/dL to mmol/L: ×0.357).
